# Supplementary material for: Identification of novel Src, Bcl-2 dual inhibitors by the pharmacophore model, molecular docking, and molecular dynamics simulations
Source: Royal Society of Chemistry journal article supplement (doi:10.1039/d1nj02147h), 2021-01-01
Supplement: d1nj02147h1.pdf [file d1nj02147h1.pdf]

# **Identification of novel Src, Bcl-2 dual inhibitors by Pharmacophore Model, Molecular Docking, and Molecular Dynamics Simulations**

Li-chuan Zhang<sup>1</sup>, Hao-ran Zhang<sup>1</sup>, Cheng-long Gao<sup>1</sup>, Ri-lei Yu<sup>2</sup>, Cong-min Kang<sup>1</sup>

<sup>1</sup>College of Chemical Engineering, Qingdao University of Science and Technology, Qingdao,  
266042 China

<sup>2</sup>Key Laboratory of Marine Drugs, Chinese Ministry of Education, School of Medicine and  
Pharmacy, Ocean University of China, Qingdao, 266003 China

**Table S1.** Information about small molecules in the Src active validation set

| <b>No.</b>                     | <b>Structure</b>                                                                                                                                                                                                                                                                                                                                                                              | <b>Active</b> |
|--------------------------------|-----------------------------------------------------------------------------------------------------------------------------------------------------------------------------------------------------------------------------------------------------------------------------------------------------------------------------------------------------------------------------------------------|---------------|
| Dasatinib<br>CAS 302962-49-8   | 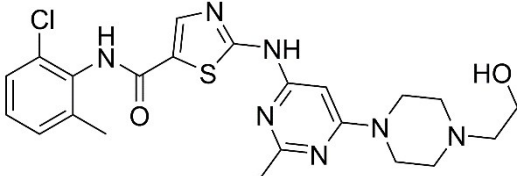 <p>The structure of Dasatinib features a central pyrimidopyrimidine core. It is substituted with a 2-chloro-3-methylphenyl group, a 2-hydroxyethylpiperazine ring, and a 2-thiazolyl group. The thiazole ring is further substituted with a 2-(3-chloro-4-(2-hydroxyethyl)piperazin-1-yl)phenyl group.</p> | Ki = 16pM     |
| Saracatinib<br>CAS 379231-04-6 |  <p>The structure of Saracatinib consists of a central pyrimidopyrimidine core. It is substituted with a 2-(2-(2-methylpiperazin-1-yl)ethoxy)phenyl group, a 2-(2-chloro-4-(2-hydroxyethyl)piperazin-1-yl)phenyl group, and a 2-(2-(2-hydroxyethyl)piperazin-1-yl)phenyl group.</p>                         | IC50 = 2.7nM  |
| A 419259<br>CAS 364042-47-7    |  <p>The structure of A 419259 features a central pyrimidopyrimidine core. It is substituted with a 2-(2-(2-methylpiperazin-1-yl)cyclohexyl)phenyl group, a 2-(2-(2-hydroxyethyl)piperazin-1-yl)phenyl group, and a 2-(2-(2-hydroxyethyl)piperazin-1-yl)phenyl group.</p>                                    | IC50 = 9nM    |
| WH-4-023<br>CAS 837422-57-8    |  <p>The structure of WH-4-023 consists of a central pyrimidopyrimidine core. It is substituted with a 2-(2-(2-methylpiperazin-1-yl)ethoxy)phenyl group, a 2-(2-(2-hydroxyethyl)piperazin-1-yl)phenyl group, and a 2-(2-(2-hydroxyethyl)piperazin-1-yl)phenyl group.</p>                                    | IC50 = 6nM    |
| eCF506<br>CAS 1914078-41-3     |  <p>The structure of eCF506 features a central pyrimidopyrimidine core. It is substituted with a 2-(2-(2-methylpiperazin-1-yl)ethoxy)phenyl group, a 2-(2-(2-hydroxyethyl)piperazin-1-yl)phenyl group, and a 2-(2-(2-hydroxyethyl)piperazin-1-yl)phenyl group.</p>                                        | IC50 < 0.5nM  |

**Table S2.** Information about small molecules in the Bcl-2 active validation set

| No.                            | Structure                                                                                                                                                                                                                                                                                                                                                                                                                                         | Active       |
|--------------------------------|---------------------------------------------------------------------------------------------------------------------------------------------------------------------------------------------------------------------------------------------------------------------------------------------------------------------------------------------------------------------------------------------------------------------------------------------------|--------------|
| Venetoclax<br>CAS 1257044-40-8 | 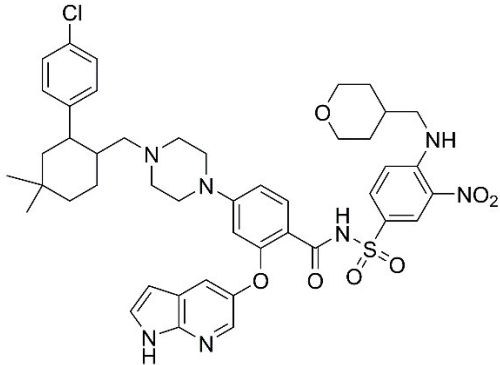 <p>The structure of Venetoclax features a central benzene ring substituted with a 4-chlorophenyl group, a piperazine ring, a 2-oxo-1,2,3,4-tetrahydroquinoline-5-yl group, and a sulfonamide group. The sulfonamide group is further substituted with a morpholine ring and a 2-nitrophenyl group.</p>                                                         | Ki = 0.01 nM |
| Navitoclax<br>CAS 923564-51-6  |  <p>The structure of Navitoclax consists of a central benzene ring with a 4-chlorophenyl group, a piperazine ring, a sulfonamide group, and a sulfonamide group substituted with a trifluoromethyl group and a morpholine ring. A thioether bridge connects the central benzene ring to a phenyl ring, which is further substituted with a morpholine ring.</p> | Ki = 1 nM    |
| S55746<br>CAS 1448584-12-0     |  <p>The structure of S55746 is a complex polycyclic molecule featuring a central benzene ring with a hydroxyphenyl group, a piperazine ring, a morpholine ring, and a morpholine ring. It also includes a piperidine ring and a morpholine ring.</p>                                                                                                           | Ki = 1.3 nM  |
| BCL2-IN-1<br>CAS 1257044-75-9  |  <p>The structure of BCL2-IN-1 features a central benzene ring with a 4-chlorophenyl group, a piperazine ring, a morpholine ring, a sulfonamide group, and a morpholine ring. It also includes a morpholine ring and a morpholine ring.</p>                                                                                                                   | Ki = 0.01 nM |
| A-385358<br>CAS 406228-55-5    |  <p>The structure of A-385358 consists of a central benzene ring with a piperazine ring, a sulfonamide group, and a sulfonamide group. It also includes a morpholine ring and a morpholine ring.</p>                                                                                                                                                          | Ki = 67 nM.  |

|                                                          |                                                                                                                                                                                                                                                                                                                                                                                                                                                                                                                                   |                     |
|----------------------------------------------------------|-----------------------------------------------------------------------------------------------------------------------------------------------------------------------------------------------------------------------------------------------------------------------------------------------------------------------------------------------------------------------------------------------------------------------------------------------------------------------------------------------------------------------------------|---------------------|
| <p>BM 957<br/>CAS 1391107-54-2</p>                       | 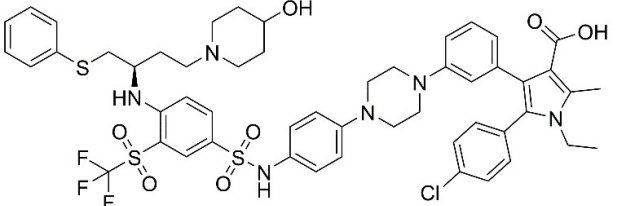 <p>The structure of BM 957 is a complex molecule featuring a central benzimidazole ring system. It is substituted with a 4-chlorophenyl group, a 4-(4-hydroxypiperidin-1-yl)phenyl group, a 4-(4-(2-phenylpropan-2-ylamino)phenyl)phenyl group, and a 4-(4-(trifluoromethyl)sulfonyl)phenyl group. The benzimidazole ring also has a methyl group and a carboxylic acid group attached to it.</p>                                              | <p>IC50 = 5.4nM</p> |
| <p>Bcl-2/Bcl-xl<br/>inhibitor 1<br/>CAS 2180923-05-9</p> |  <p>The structure of Bcl-2/Bcl-xl inhibitor 1 is a complex molecule featuring a central benzimidazole ring system. It is substituted with a 4-(4-chlorophenyl)phenyl group, a 4-(4-(2-(4-chlorophenyl)cyclohexyl)methyl)piperidin-1-yl)phenyl group, a 4-(4-nitrophenyl)phenyl group, and a 4-(4-(2-(4-methoxyphenyl)phenyl)phenyl)phenyl group. The benzimidazole ring also has a methyl group and a carboxylic acid group attached to it.</p> | <p>IC50 = 2 nM</p>  |

**Table S3.** The hydrogen bonding analysis of the last 10ns of MD simulation(T=300K)

| Complex           | Donor                  | Acceptor  | Distance/Å | Angle/° | Occupancy/% |
|-------------------|------------------------|-----------|------------|---------|-------------|
| Compound1-<br>Src | Compound1<br>(N41-H42) | GLU339(O) | 2.883      | 14.29   | 90.54%      |
|                   | Compound1<br>(N41-H42) | MET341(O) | 3.152      | 14.95   | 0.03%       |
| QTZ101-Src        | QTZ101<br>(N41-H42)    | GLU339(O) | 3.023      | 13.45   | 0.01%       |
|                   | QTZ101<br>(N41-H42)    | MET341(O) | 2.879      | 14.17   | 59.20%      |

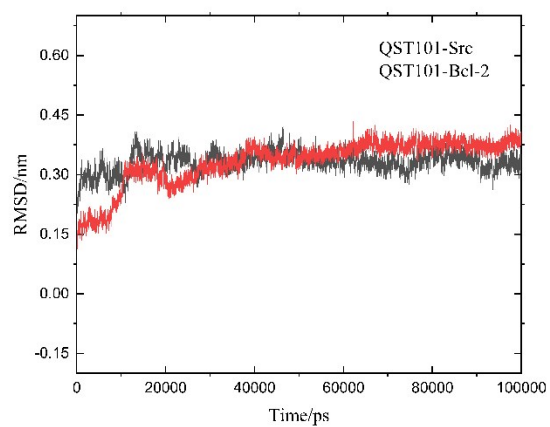

**Figure S1.** Root mean square deviation of protein backbone atoms ( $T = 310\text{K}$ ).
